# Supplementary material for: Optimal Design of Safety Instrumented Systems for Pressure Control of Methanol Separation Columns in the Bisphenol A Manufacturing Process
Source: Preprints.org preprint supplement (doi:10.20944/preprints201612.0114.v1), 2016-12-23
Supplement: Supplementary file 1 [file supplementary]

Page 11, line 293. Reference to Appendix B and C was added.

Page 14, line 335. Reference to Appendix B was added.

Page 14, line 336. Reference to Appendix C was added.

Page 15, line 401. Appendix B was added.

Page 18, line 412. Appendix C was added.
